# Supplementary material for: Characterization of the Putative Acylated Cellulose Synthase Operon in Komagataeibacter xylinus E25
Source: MDPI journal article supplement (doi:10.3390/ijms23147851), 2022-07-16

# Characterization of the putative acylated cellulose synthase operon in *Komagataeibacter xylinus* E25

Izabela Szymczak<sup>1\*</sup>, Agnieszka J. Pietrzyk-Brzezińska<sup>1\*</sup>, Kajetan Duszyński<sup>1</sup>, Małgorzata Ryngajłło<sup>1\*</sup>

Institute of Molecular and Industrial Biotechnology, Lodz University of Technology, B. Stefanowskiego 2/22, 90-537 Lodz, Poland;  
izabela.redzynia@p.lodz.pl (ORCID: 0000-0002-0944-8237), agnieszka.pietrzyk-brzezinska@p.lodz.pl (ORCID: 0000-0003-1565-7307),  
kajetan.duszynski@dokt.p.lodz.pl, malgorzata.ryngajllo@p.lodz.pl (ORCID: 0000-0002-0430-0102)

\*Correspondence: malgorzata.ryngajllo@p.lodz.pl; +48 0426313354

<sup>1</sup>These two authors contributed equally to the study.

## SUPPLEMENTARY INFORMATION

### Supplementary Tables

**Table S1.** Amino acid sequence identity (in %) between the protein products of *bcsII* operon of *K. xylinus* E25 and respective proteins of other *Komagataeibacter* type strains as well as homologs from bacteria that do not belong to *Acetobacteraceae* family (species representative sequences).

| Strain name                                       | BcsX | BcsY | BcsZ |
|---------------------------------------------------|------|------|------|
| <i>K. swingsii</i> LMG 22125 <sup>T</sup>         | 100  | 98   | 97   |
| <i>K. intermedius</i> TF2 <sup>T</sup>            | 96   | 89   | -    |
| <i>K. xylinus</i> LMG 1515 <sup>T</sup>           | 95   | 82   | 60   |
| <i>K. diospyri</i> MSKU9 <sup>T</sup>             | 94   | 88   | -    |
| <i>K. sucrofermentans</i> LMG 18788 <sup>T</sup>  | 95   | 82   | 61   |
| <i>K. nataicola</i> LMG 1536 <sup>T</sup>         | 95   | 81   | 62   |
| <i>K. europaeus</i> LMG 18890 <sup>T</sup>        | 90   | 95   | 91   |
| <i>K. pomaceti</i> T5K1 <sup>T</sup>              | 89   | 74   | 61   |
| <i>K. cocois</i> WE7 <sup>T</sup>                 | 89   | 74   | 61   |
| <i>K. maltaceti</i> LMG 1592 <sup>T</sup>         | 87   | 74   | 62   |
| <i>K. xylinus</i> CGCMCC 2955                     | 88   | 79   | -    |
| <i>K. rhaeticus</i> LMG 22126 <sup>T</sup>        | 87   | 79   | -    |
| <i>K. saccharivorans</i> LMG 1582 <sup>T</sup>    | 84   | 67   | 57   |
| <i>K. hansenii</i> ATCC 53582                     | 77   | 67   | -    |
| <i>Ga. entanii</i> LTH 4560 <sup>T</sup>          | 75   | 68   | -    |
| <i>Polynucleobacter aenigmaticus</i> hydrolase    | 46   | -    | -    |
| <i>Castellaniella defragrans</i> hydrolase        | 42   | -    | -    |
| <i>Pseudomonas alcaligenes</i> hydrolase          | 43   | -    | -    |
| <i>Enterobacter lignolyticus</i> acyltransferase  | -    | 52   | -    |
| <i>Rhizobium sullae</i> acyltransferase           | -    | 36   | -    |
| <i>Pseudomonas fluorescens</i> acyltransferase    | -    | 36   | -    |
| <i>Caenorhabditis elegans</i> acyltransferase     | -    | 30   | -    |
| <i>Bermanella marisrubri</i> arylesterase         | -    | -    | 26   |
| <i>Desulfobacter hydrogenophilus</i> arylesterase | -    | -    | 30   |
| <i>Escherichia coli</i> thioesterase              | -    | -    | 25   |

<sup>T</sup> Type strain

**Table S2.** Primer sequences used for PCR. Upper case letters represent the part of the sequence complementary to a gene, italic font was used to highlight restriction sites.

| Primer  | Sequence                                   |
|---------|--------------------------------------------|
| bcsX_fw | 5'-atatccatggCGATGAATGCCCTTCTTGCAGG-3'     |
| bcsX_rv | 5'-atatctcgagACCACGTCAGGATAGGCTTATTGC-3'   |
| bcsY_fw | 5'-atatatcaatggCGATGCTGCAACTTACCCCTTC-3'   |
| bcsY_rv | 5'-atatctcgagGGtTTAATGGACACGAGACACATGGG-3' |
| bcsZ_fw | 5'-atatatcaatggCGATGCCGGGACGCCTG-3'        |
| bcsZ_rv | 5'-atatctcgagTTATTTACTGAACAGGGTCCCGATAC-3' |

## Supplementary Figures

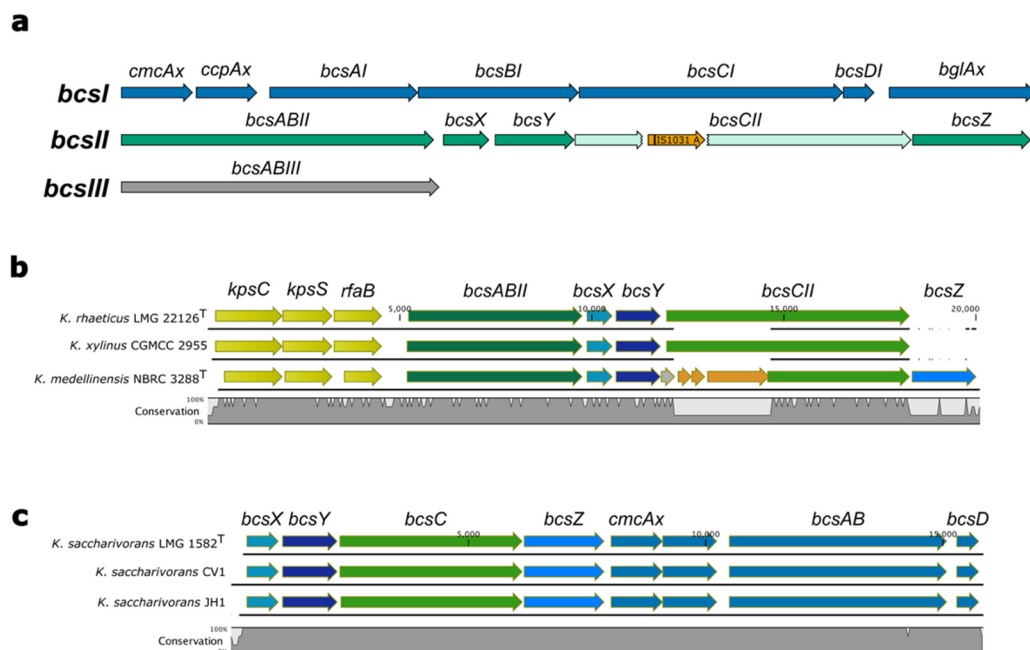

**Figure S1.** Cellulose synthase clusters in *K. xylinus* E25 and other *Komagataeibacter* species. a). operons *bcsI*, *bcsII* and *bcsIII* of *K. xylinus* E25; b). Alignment of operon *bcsII* in *K. rhaeticus* LMG 22126, *K. xylinus* CGMCC 2955, *K. medellinensis* NBRC 3288 with upstream cluster of genes associated with extracellular matrix formation (*kpsC*, *kpsS*, *rfaB*); c). Alignment of *bcsII* operon fused with *bcsI* in the strains of *K. saccharivorans*.

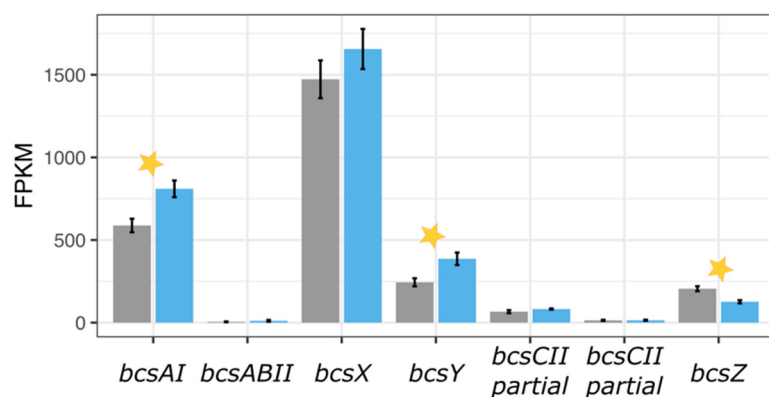

**Figure S2.** Changes in expression of the *bcsAI* gene and the *bcsII* operon based on published transcriptomic data for *K. xylinus* E25 (Ryngajłło et al., 2019). Genes are coloured according to  $\log_2$  fold change in expression between SH and SH+EtOH cultures. Stars denote statistically significant changes (called by DESeq2; adjusted  $p$ -value  $\leq 0.05$ ). Thin black bars denote standard error.

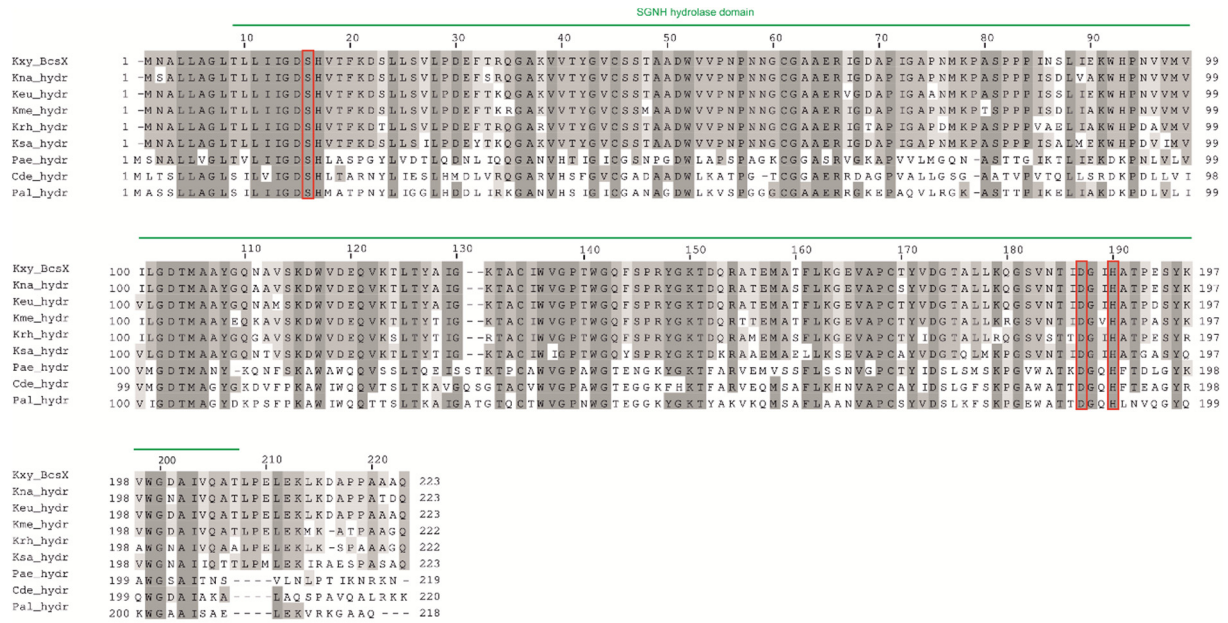

**Figure S3.** Sequence alignment of BcsX from *K. xylinus* E25 (Kxy) and SGNH hydrolases (hydr) from *K. naticola* (Kna), *K. europaeus* (Keu), *K. medellinensis* (Kme), *K. rhaeticus* (Krh), *K. saccharivorans* (Ksa), *Polynucleobacter aenigmaticus* (Pae), *Castellaniella defragrans* (Cde), and *Pseudomonas alcaligenes* (Pal). Sequences were aligned using ClustalΩ (<https://www.ebi.ac.uk/Tools/msa/clustalo>) and presented using Jalview (<http://www.jalview.org>). Intensity of the gray color gradient reflects sequence identities and similarities. Numbering above the alignment is according to *K. xylinus* BcsX. The SGNH hydrolase domain is marked with a green line. The residues of the catalytic triad are presented in red boxes.

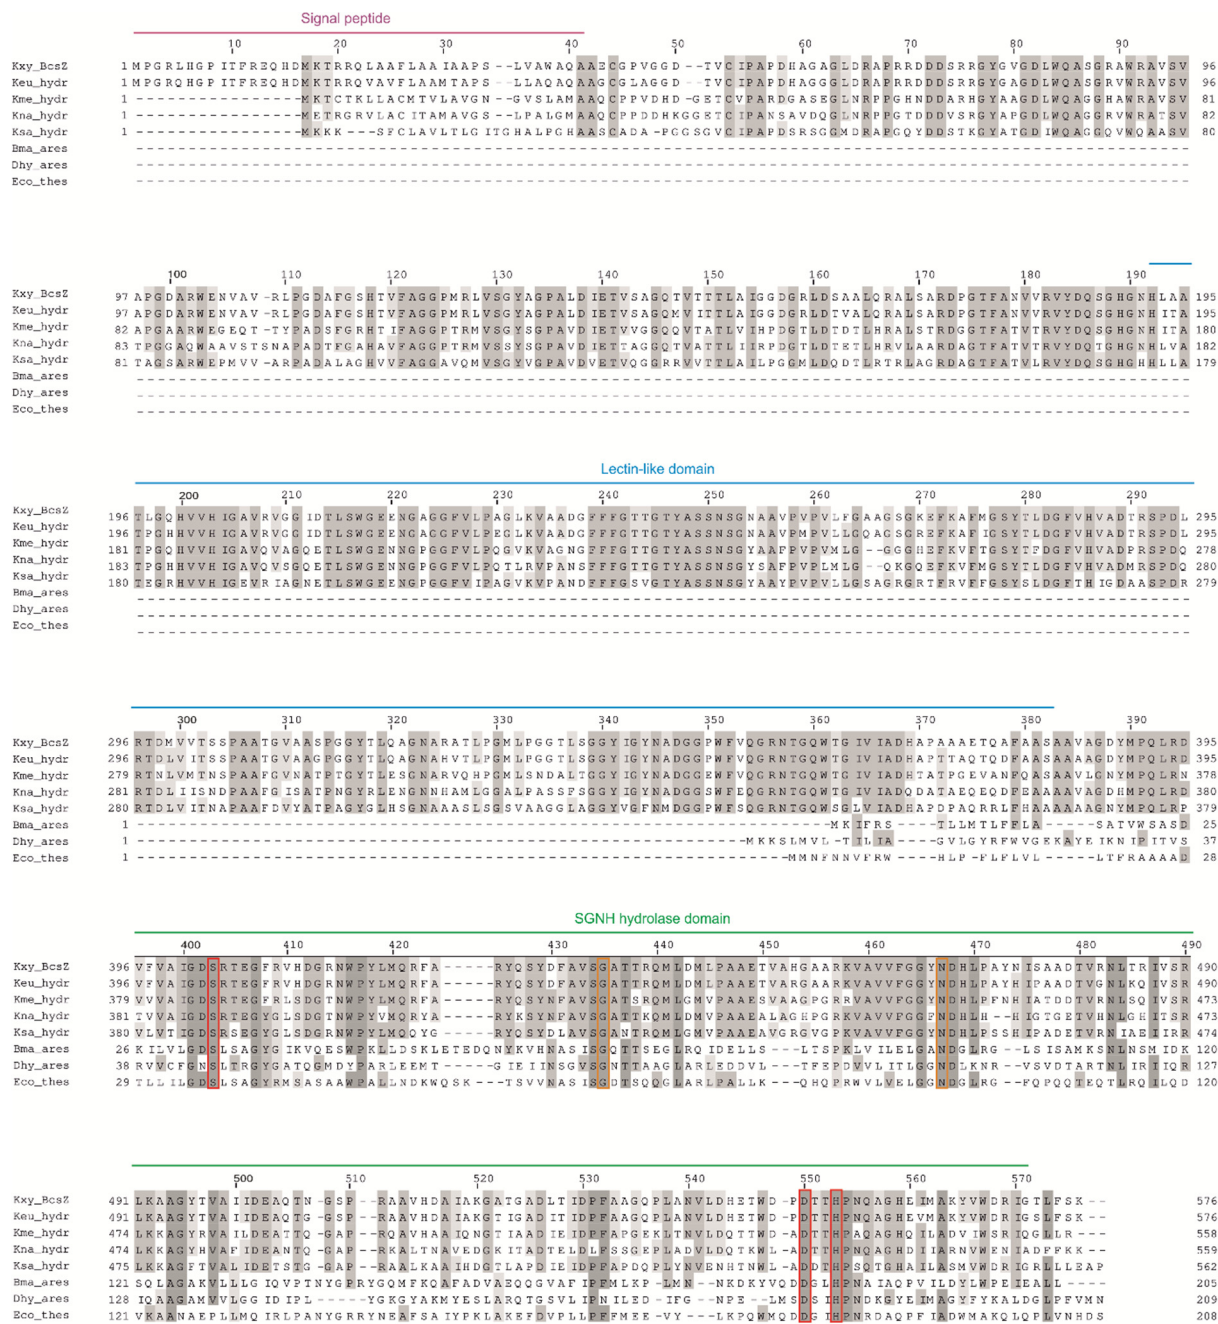

**Figure S4.** Sequence alignment of BcsZ from *K. xylinus* E25 (Kxy) and SGNH hydrolases (hydr) from *K. europaeus* (Keu), *K. medellinensis* (Kme), *K. nataicola* (Kna), *K. saccharivorans* (Ksa), arylesterases (ares) from *Bermanella marisrubri* (Bma), *Desulfobacter hydrogenophilus* (Dhy), and thioesterase (thes) from *Escherichia coli* (Eco). Sequences were aligned using ClustalΩ (<https://www.ebi.ac.uk/Tools/msa/clustalo>) and presented using Jalview (<http://www.jalview.org>). Intensity of the gray color gradient reflects sequence identities and similarities. Numbering above the alignment is according to *K. xylinus* BcsZ. Signal peptide, lectin-like domain and SGNH hydrolase domain are marked with a purple, blue and green line, respectively. The residues of the catalytic triad are presented in red boxes, whereas the residues of the oxyanion hole are in orange boxes.

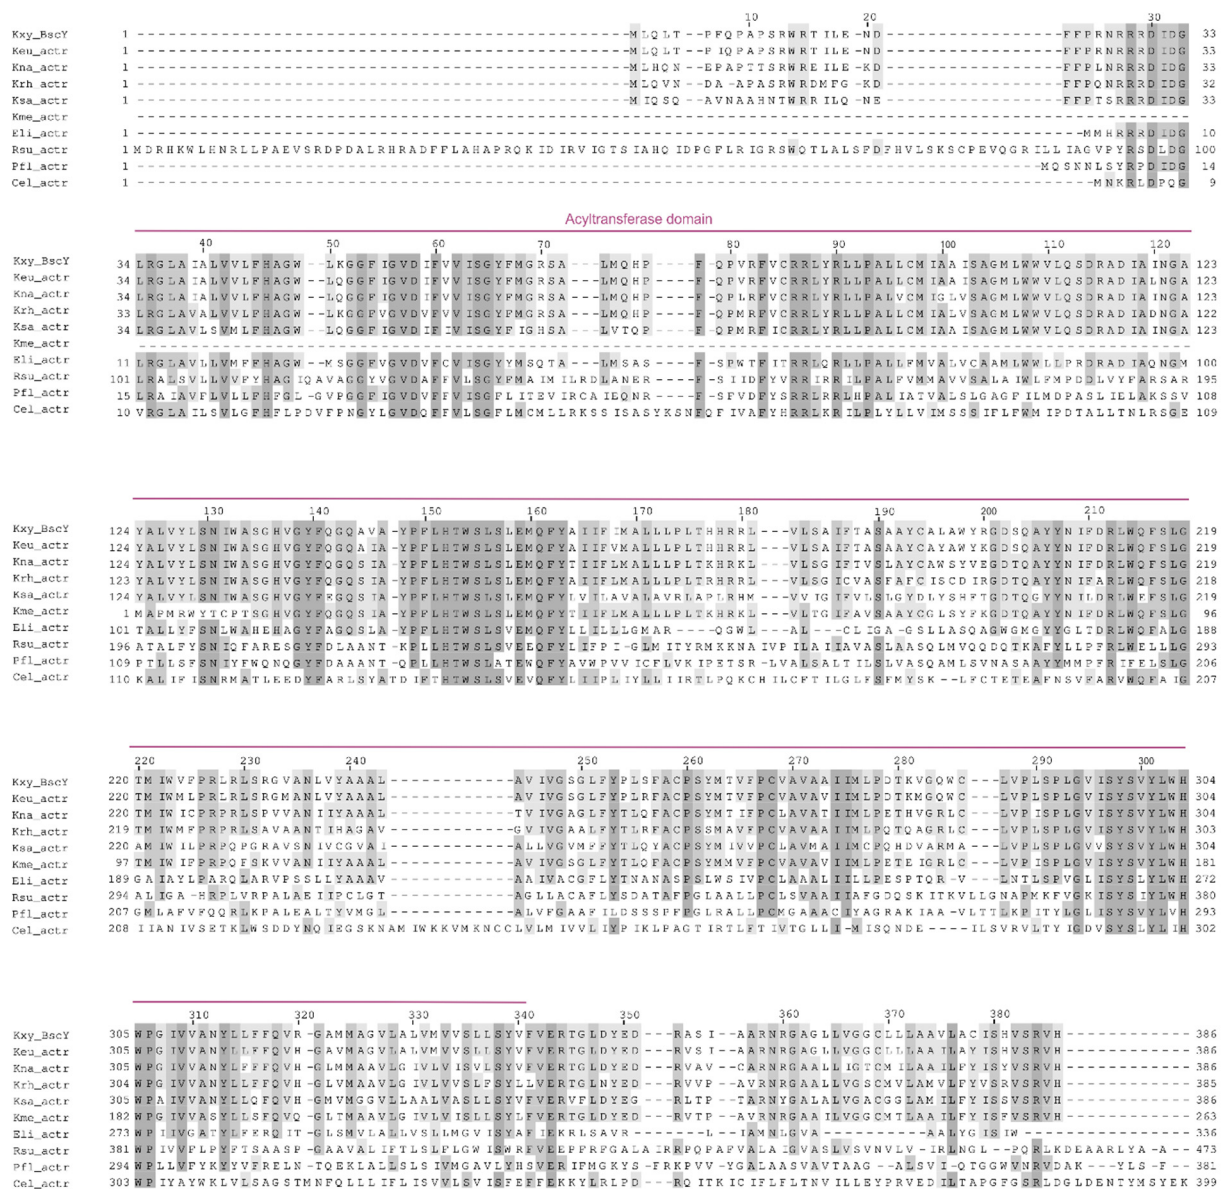

**Figure S5.** Sequence alignment of BcsY from *K. xylinus* E25 (Kxy) and acyltransferases (actr) from *K. europaeus* (Keu), *K. nataicola* (Kna), *K. rhaeticus* (Krh), *K. saccharivorans* (Ksa), *K. medellinensis* (Kme), *Enterobacter lignolyticus* (Eli), *Rhizobium sultae* (Rsu), *Pseudomonas fluorescens* (Pfl), and *Caenorhabditis elegans* (Cel). Sequences were aligned using ClustalΩ (<https://www.ebi.ac.uk/Tools/msa/clustalo>) and presented using Jalview (<http://www.jalview.org>). Intensity of the gray color gradient reflects sequence identities and similarities. Numbering above the alignment is according to *K. xylinus* BcsY. Acyltransferase domain is marked with a purple line.



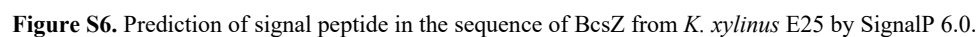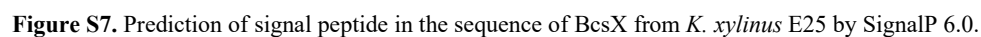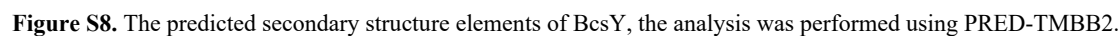

Supplement: s1 [file s1]
